# Supplementary material
Source: PubMed Central journal article supplement (PMC1891224)
Supplement: pnas_0701519104_11.pdf [file pnas_0701519104_11.pdf]

**A**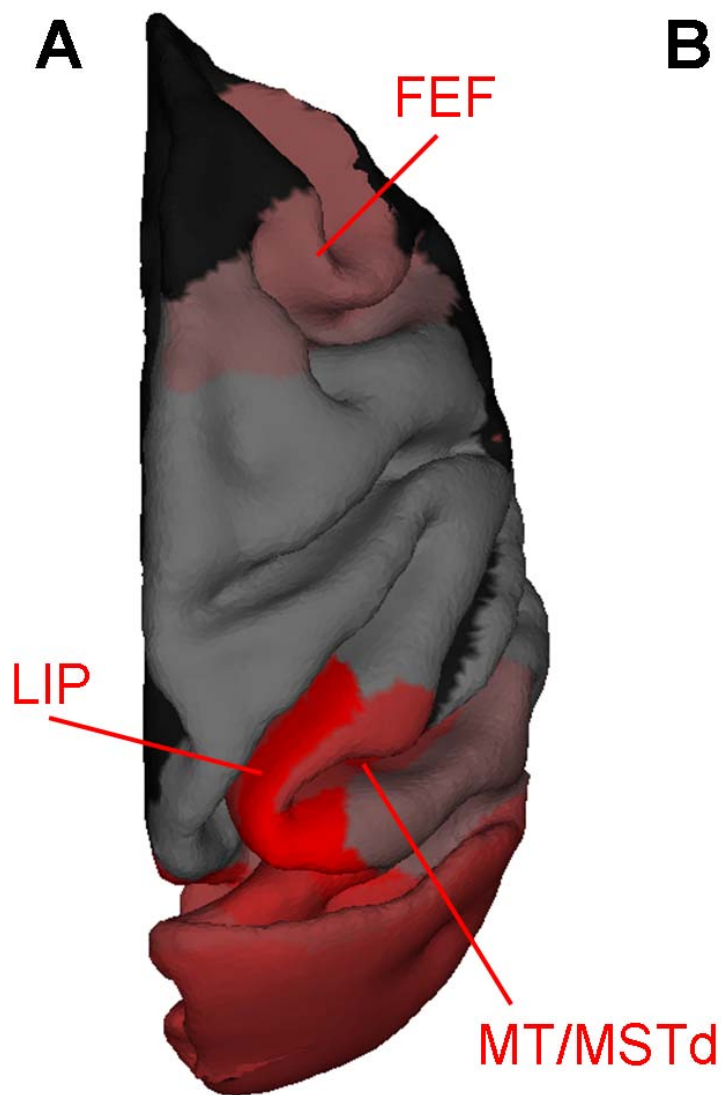

0.0 0.2

Area LIP  
BOLD correlations  
(functional connectivity)

**B**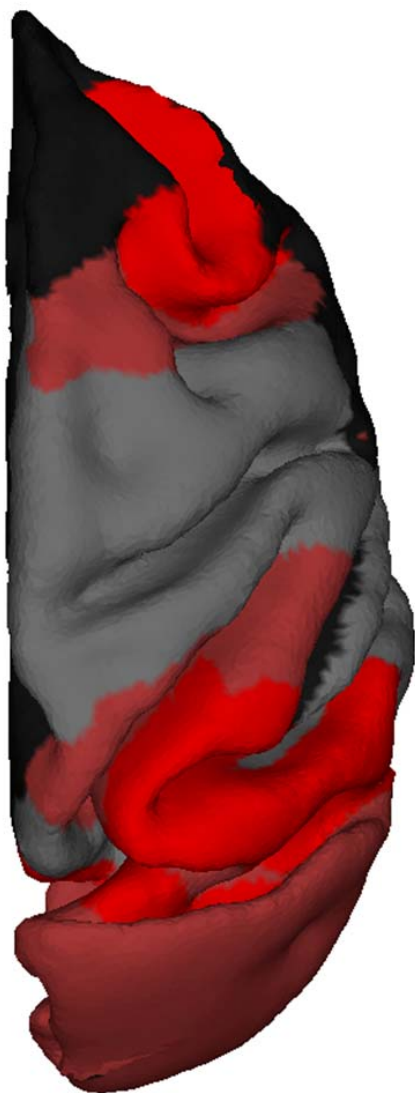

0 1 2

Area LIP  
anatomical correlations  
(structural connectivity)
