# Supplementary material
Source: PubMed Central journal article supplement (PMC1891224)

**A**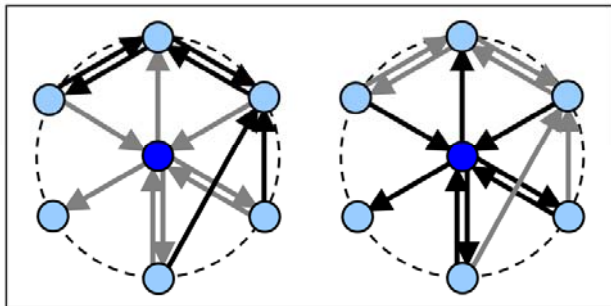**B**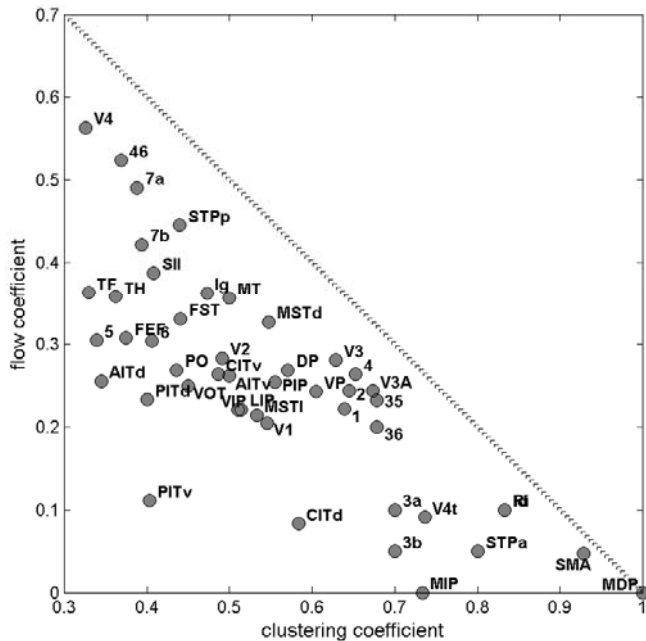

Supplement: pnas_0701519104_1.pdf [file pnas_0701519104_1.pdf]

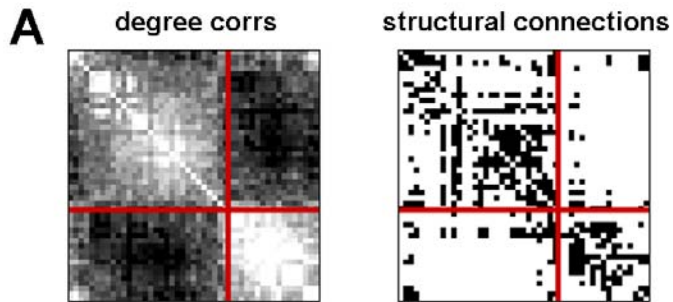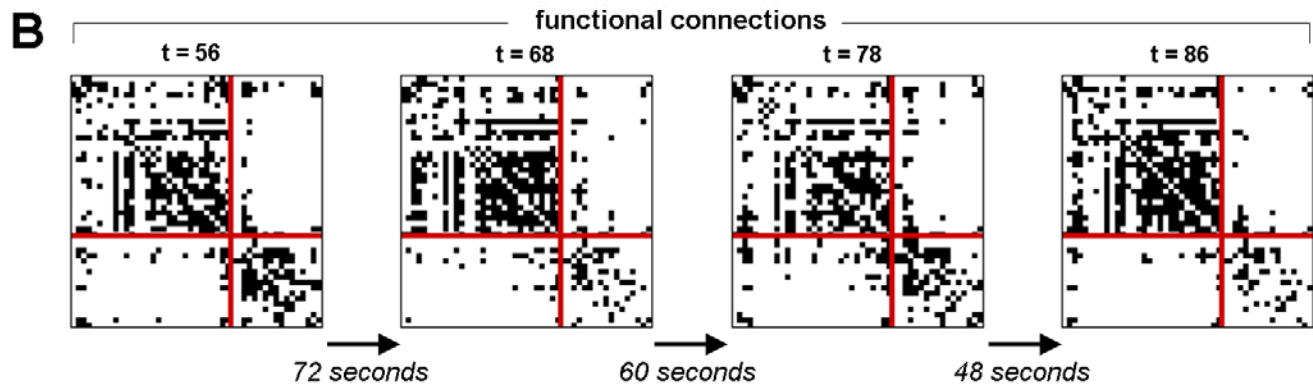

Supplement: pnas_0701519104_10.pdf [file pnas_0701519104_10.pdf]

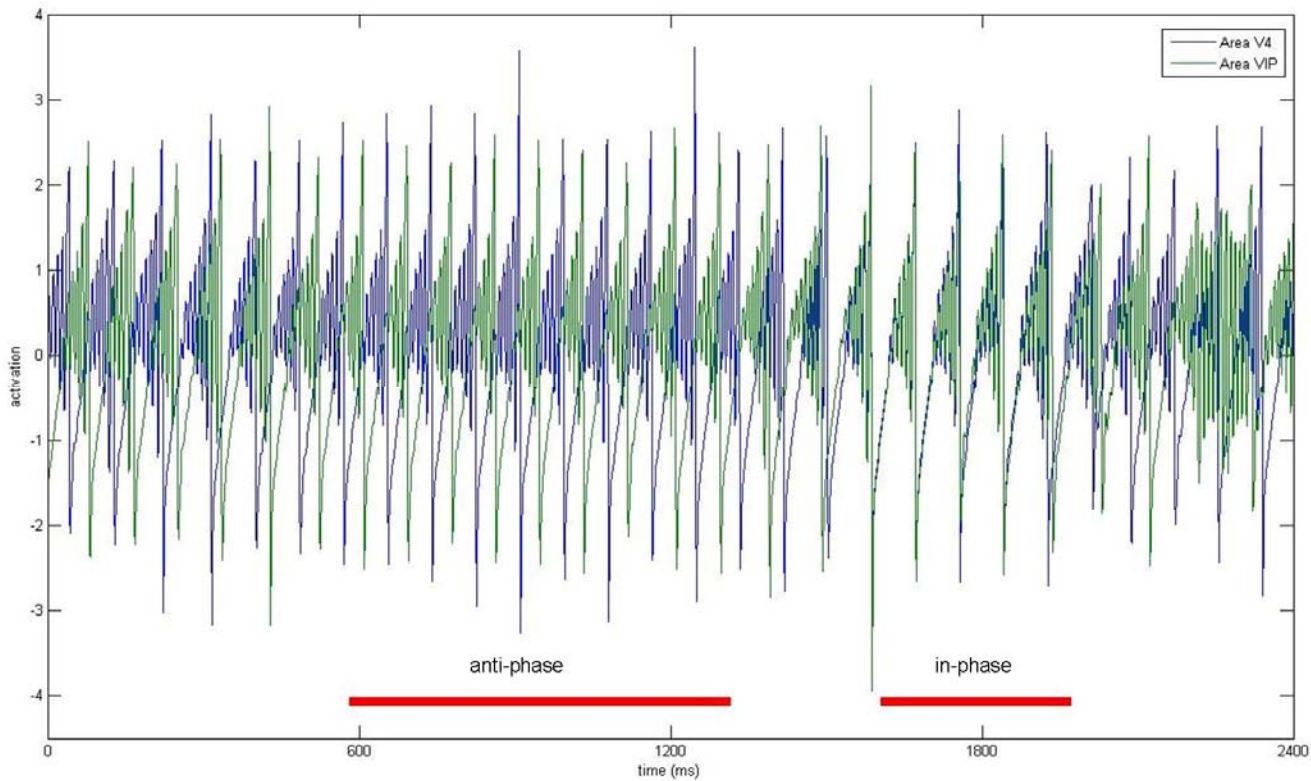

Supplement: pnas_0701519104_12.pdf [file pnas_0701519104_12.pdf]

**A**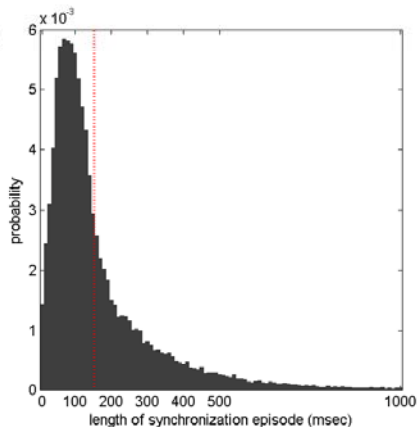**B**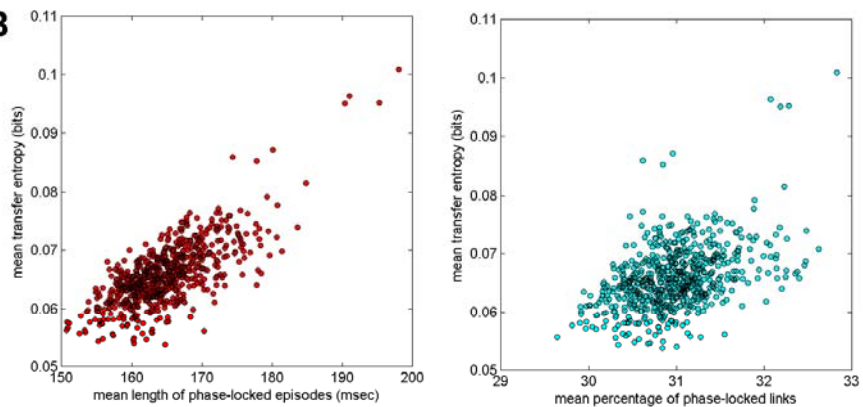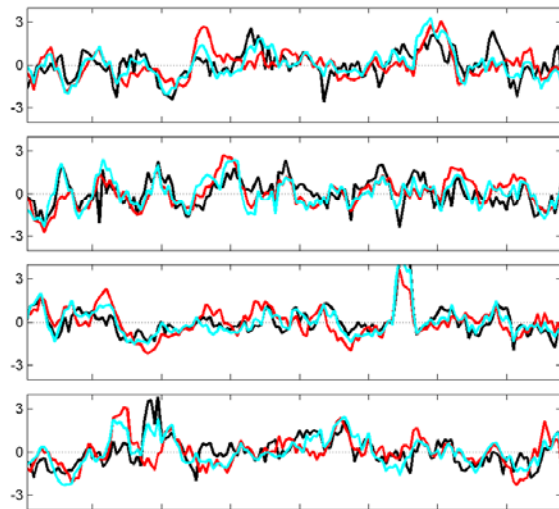

Supplement: pnas_0701519104_13.pdf [file pnas_0701519104_13.pdf]

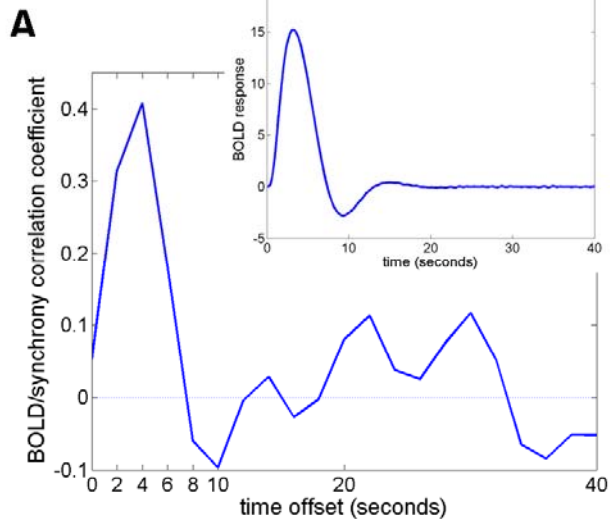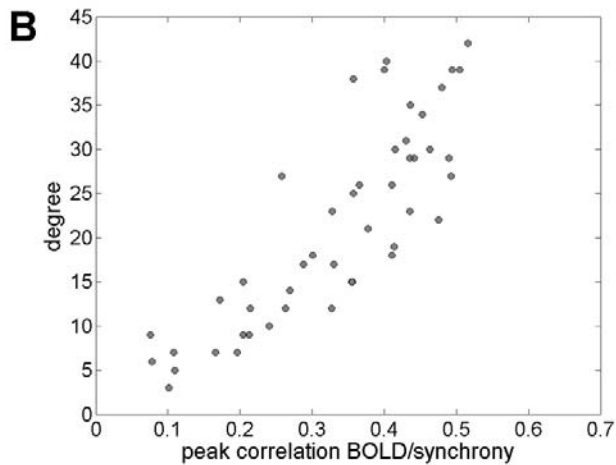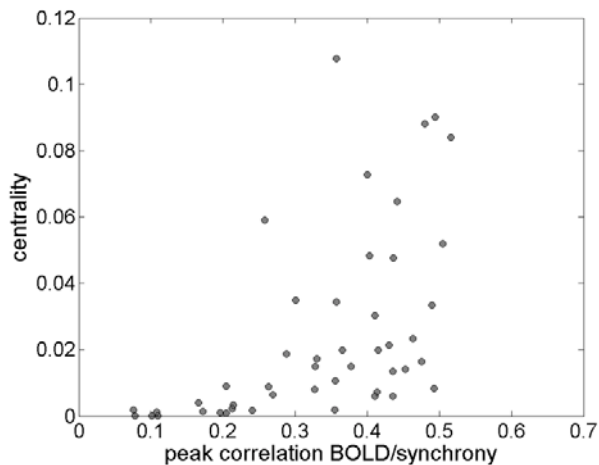

Supplement: pnas_0701519104_14.pdf [file pnas_0701519104_14.pdf]

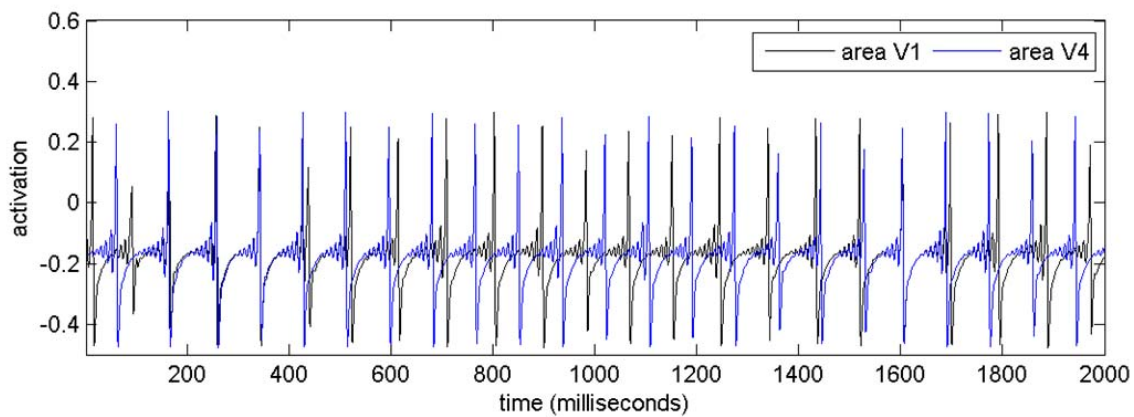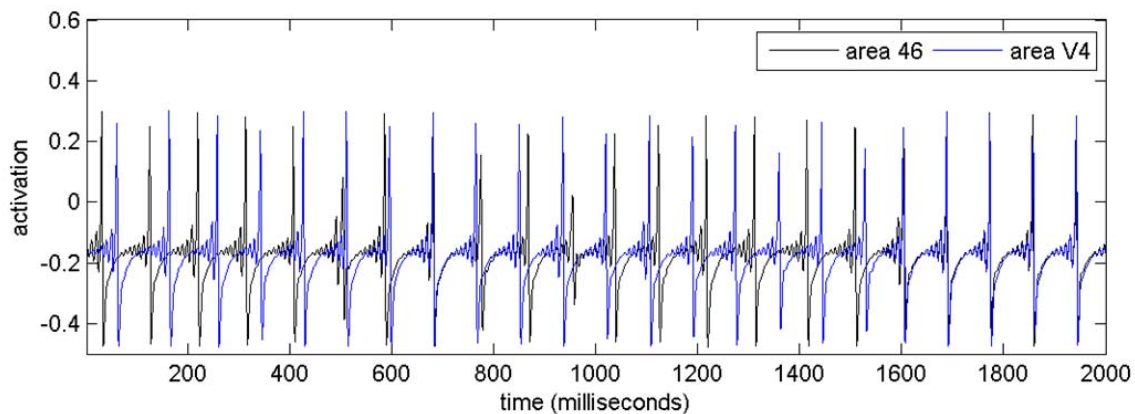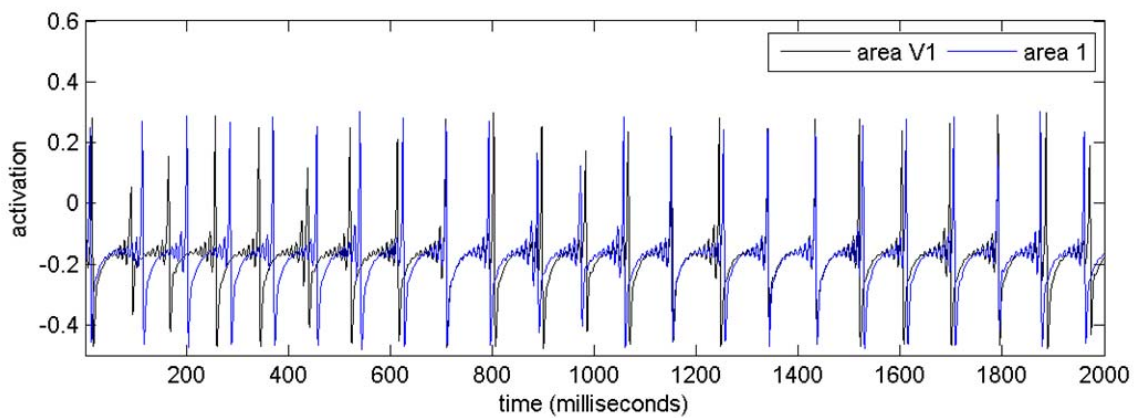

Supplement: pnas_0701519104_2.pdf [file pnas_0701519104_2.pdf]

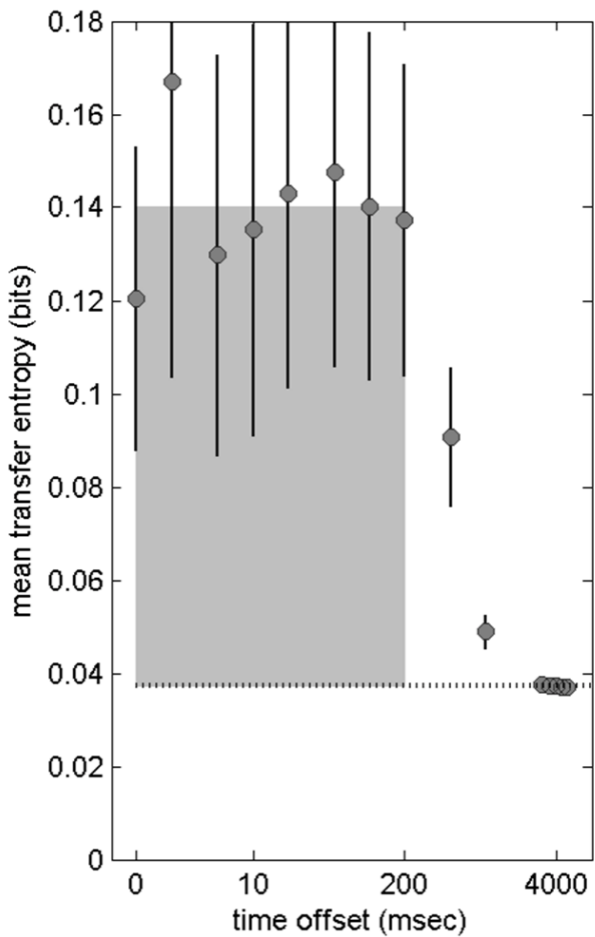

Supplement: pnas_0701519104_3.pdf [file pnas_0701519104_3.pdf]

**A**

MI

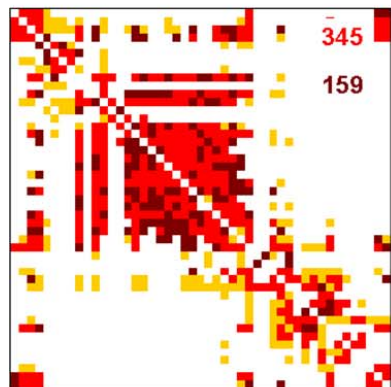

WV

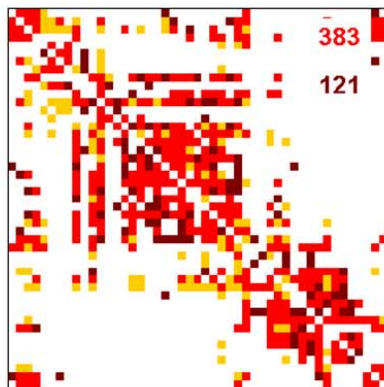

TE

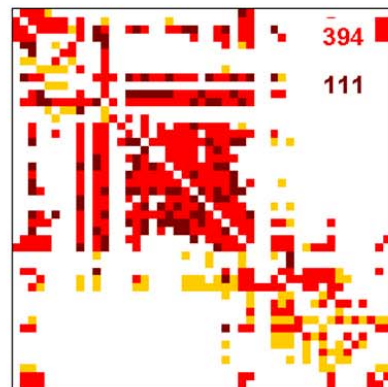

precision-recall curves

**B**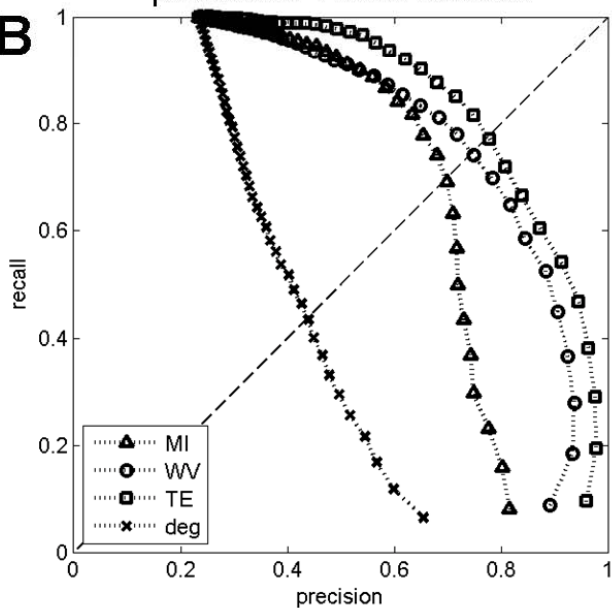

Supplement: pnas_0701519104_4.pdf [file pnas_0701519104_4.pdf]

TE:  $c=0.00$

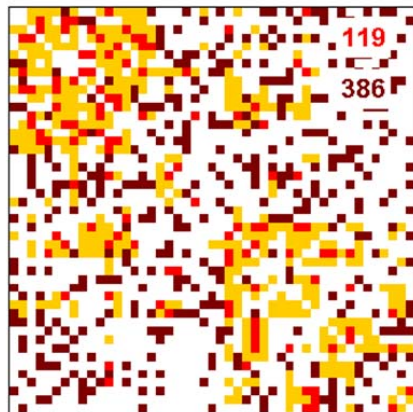

TE:  $c=0.05$

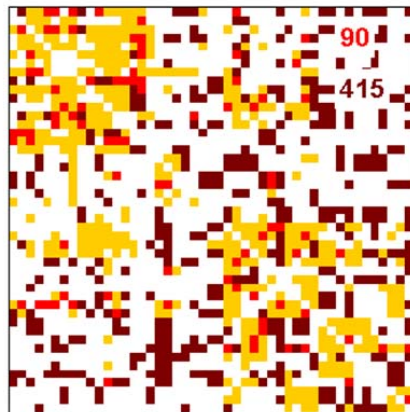

TE:  $c=0.10$

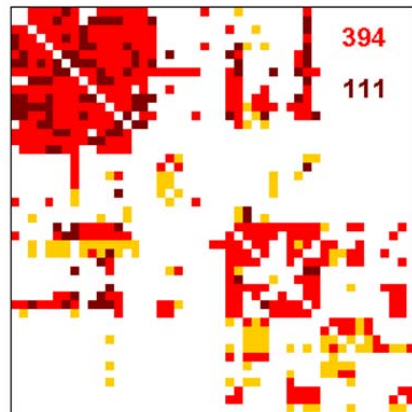

TE:  $c=0.15$

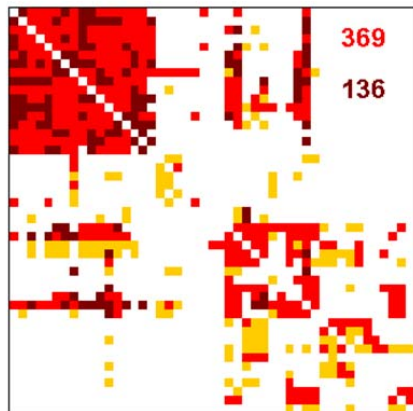

TE:  $c=0.20$

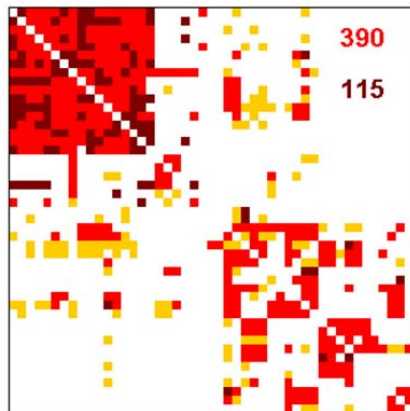

Supplement: pnas_0701519104_5.pdf [file pnas_0701519104_5.pdf]

small-world index

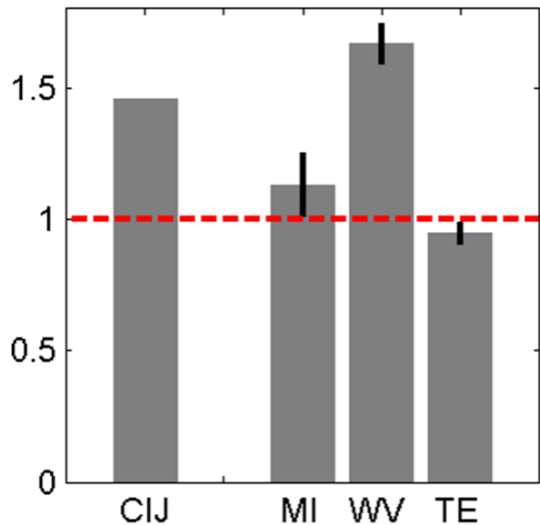

Supplement: pnas_0701519104_6.pdf [file pnas_0701519104_6.pdf]

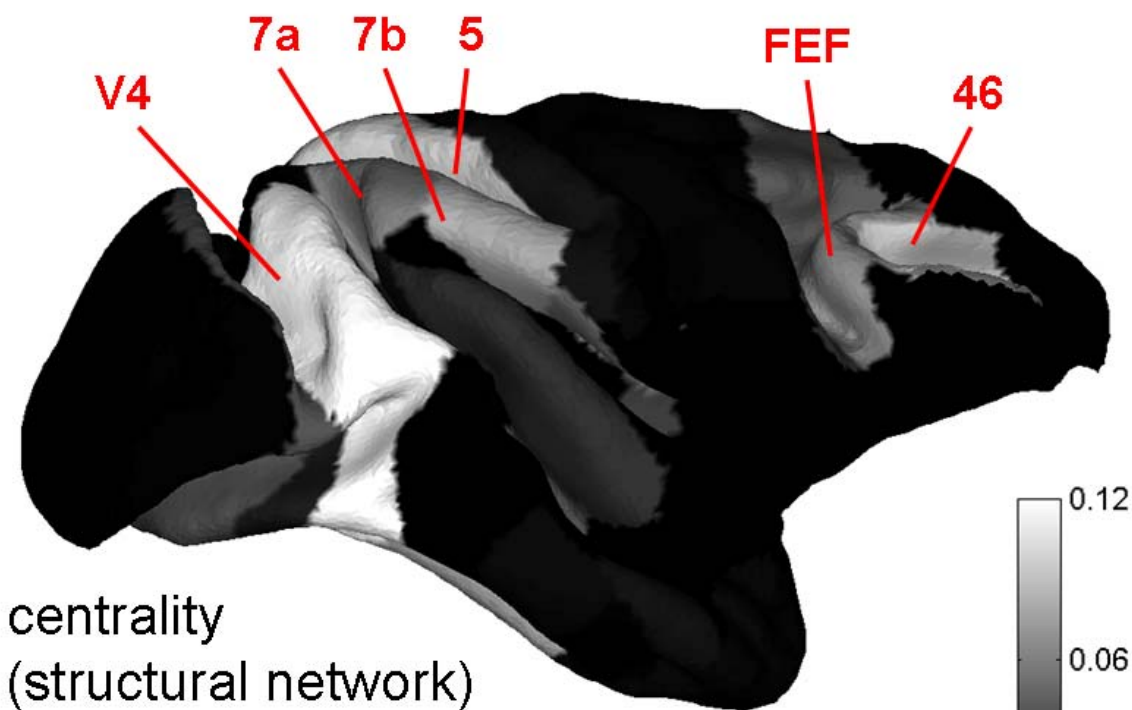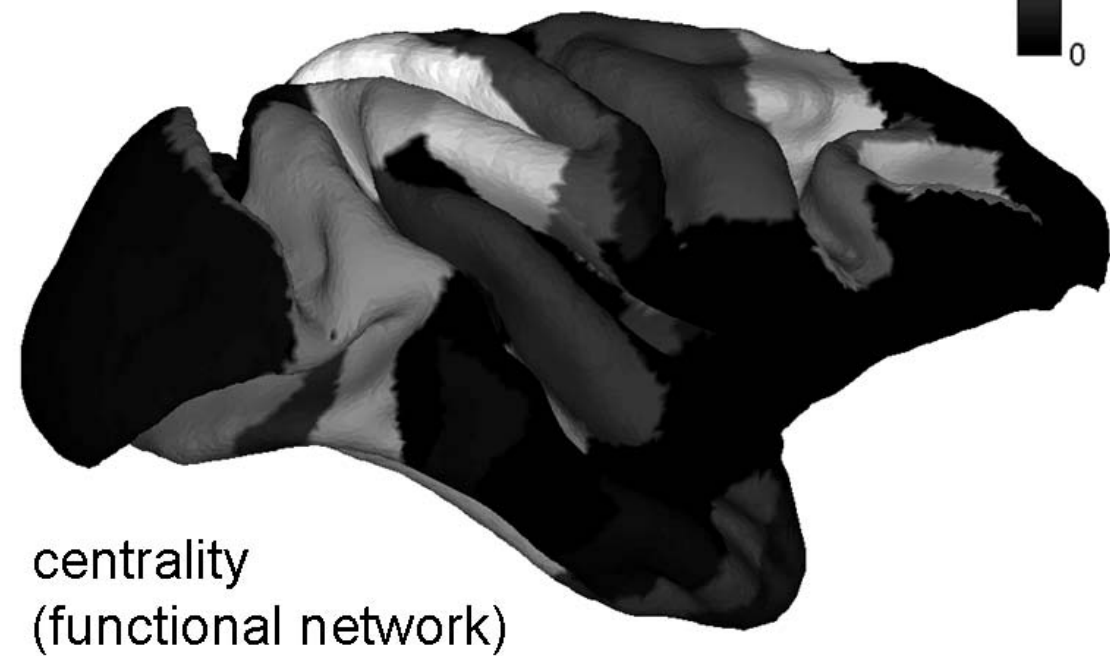

Supplement: pnas_0701519104_7.pdf [file pnas_0701519104_7.pdf]

**A**

degree

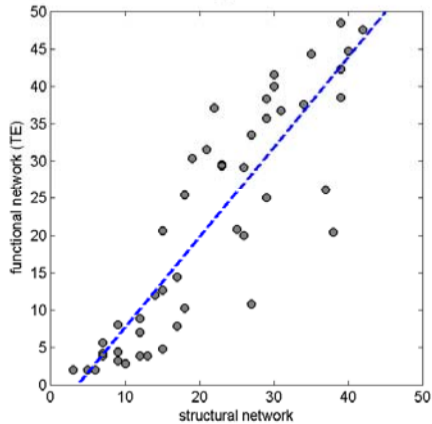**B**

flow/clustering

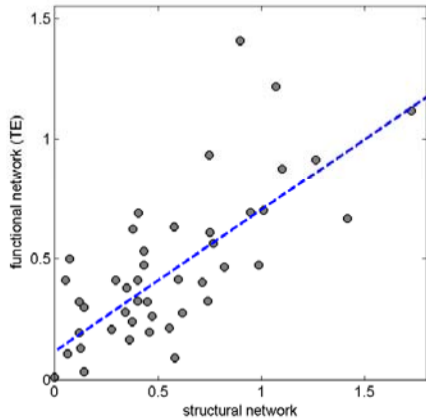**C**

clustering coefficient

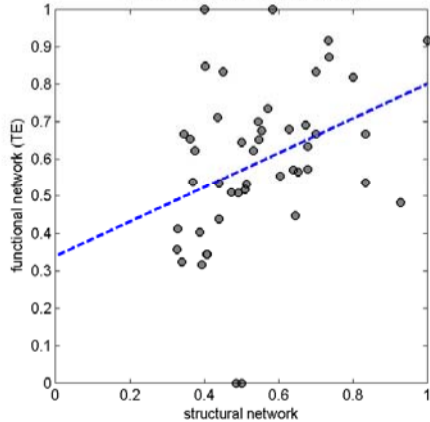

Supplement: pnas_0701519104_8.pdf [file pnas_0701519104_8.pdf]

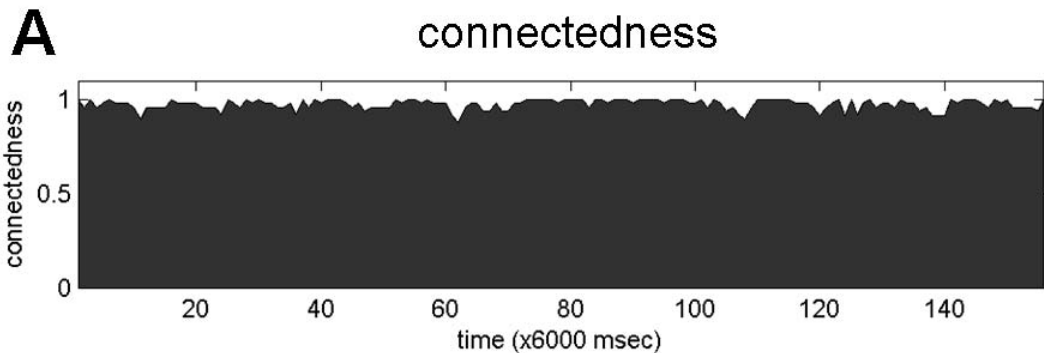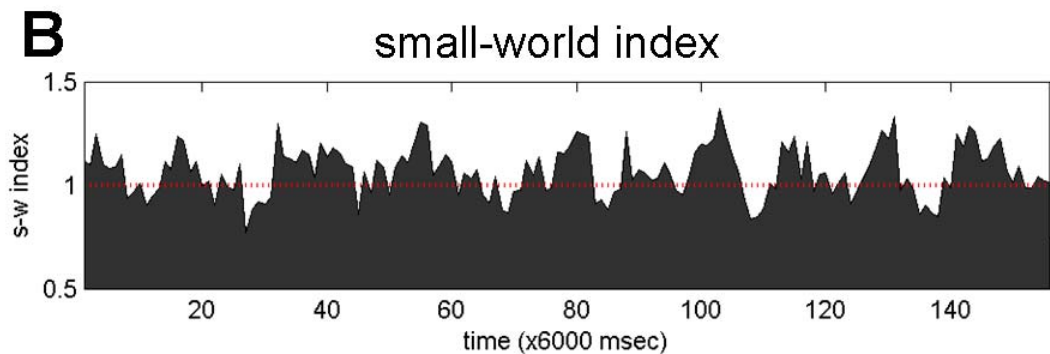

Supplement: pnas_0701519104_9.pdf [file pnas_0701519104_9.pdf]
